# Supplementary material for: Sensitivity of a leaf gas-exchange model for estimating paleoatmospheric CO 2 concentration
Source: Copernicus journal article supplement (doi:10.5194/cp-15-795-2019), 2019-04-17
Supplement: Supplementary file 1 [file cp-15-795-2019-supplement.zip]

Archive with 2 entries (2 files):
- Table S1.xlsx
- cp-15-795-2019-supplement-title-page.pdf
