# Supplementary material for: Sensitivity of a leaf gas-exchange model for estimating paleoatmospheric CO 2 concentration
Source: Copernicus journal article supplement (doi:10.5194/cp-15-795-2019), 2019-04-17
Supplement: Supplementary file 1 [file cp-15-795-2019-supplement.zip › cp-15-795-2019-supplement-title-page.pdf]

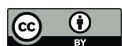

## *Supplement of*

# **Sensitivity of a leaf gas-exchange model for estimating paleoatmospheric CO<sub>2</sub> concentration**

**Dana L. Royer et al.**

*Correspondence to:* Dana L. Royer ([droyer@wesleyan.edu](mailto:droyer@wesleyan.edu))

- [cp-15-795-2019-supplement-title-page.pdf](#)
- [Table S1.xlsx](#)

The copyright of individual parts of the supplement might differ from the CC BY 4.0 License.
