# Supplementary material for: Sensitivity of a leaf gas-exchange model for estimating paleoatmospheric CO 2 concentration
Source: Copernicus journal article supplement (doi:10.5194/cp-15-795-2019), 2019-04-17
Supplement: Supplementary file 1 [file Table S1.xlsx]

## Sheet: Inputs and CO2 estimates
note: LongLane is part of Wesleyan University; column headers shaded blue were directly measured; column headers shaded orange were inferred (see column headers for details)					number of leaves measured (or number of plants measured for the growth chamber experiments)	the true CO2 concentration (ppm)	estimated median CO2 (ppm)	2.5th percentile (ppm)	16th percentile (ppm)	84th percentile (ppm)	97.5th percentile (ppm)	mean of soil organic d13C for tropical forests (measured at Parque Nacional San Lorenzo, Panama), campus locations (measured at Connecticut College), and temperate forests (measured at Reed Gap)	stomatal density (m^-2) on abaxial surface (average over stomatal and non-stomatal areas)	error in Dab	stomatal density (m^-2) on adaxial surface (average over stomatal and non-stomatal areas); zero if stomata are absent	error in Dad; zero if absent.	guard cell length (m) on abaxial surface; note: If stomatal pore length (Pl) was measured directly, Pl is entered here (and its error) along with a 1:1 scaling between GCL and Pl (s1=1) and an associated error of 0 (es1=0)	error in GCLab	guard cell length (m) on adaxial surface; note: If stomatal pore length (Pl) was measured directly, Pl is entered here (and its error) along with a 1:1 scaling between GCL and Pl (s1=1) and an associated error of 0 (es1=0)	error in GCLad; zero if absent	single guard cell width (m) on abaxial surface	error in GCWab	single guard cell width (m) on adaxial surface; zero if stomata are absent.	error in GCWad; zero if absent.	deviation in the molar abundance ratio of carbon isotopes (13C/12C) of the leaf material relative to that in the PDB standard (per mil)	error in d13Cp	deviation in the molar abundance ratio of carbon isotopes (13C/12C) in air relative to that in the PDB standard (per mil)	error in d13Ca	atmospheric CO2 concentration associated with A0 (ppm) (e.g., present-day value); this variable is assumed to have no error; if fixed_A is set to 'yes', this variable is not used	net photosynthetic rate at CO2_0 (umol/m2/s) for the mean or typical leaf temperature during the growing season; if "fixed_A" is set to yes, the value of A0 should be set to the known net photosynthetic rate	error in A0	present-day Ci/Ca value that is used to calculate An from CO2; this was calculated from the d13Cp and d13Ca values; if "fixed_A" is set to 'yes', this variable is not used	error in CiCa0; if "fixed_A" is set to 'yes', this variable is not used	boundary layer conductance to CO2 (mol/m2/s); Franks et al. (2014) suggests a generic value of 2 for typical conditions	error in gb	scaling from guard cell length (GCL) to stomatal pore length (Pl); in cases where pore length was measured directly, s1 = 0 (and with no uncertainty); scaling for Metasequoia comes from Maxbauer et al. (2014)	error in s1	scaling from single guard cell width (GCW) to stomatal depth (l); in the typical case where guard cells have a circular cross-section, this scaling = 1	error in s2	scaling from the area of a circle with the diameter of pore length to a_max (maximum area of stomatal pore); see Table S2 in Franks et al. (2014) for some generic scalings; s3 is equivalent to beta in Table S2	error in s3	scaling from maximum conductance to CO2 (gcmax) to operational conductance to CO2 (gcop); if not measured directly, Franks et al. (2014) suggest a generic scaling of 0.2; s4 is equivalent to zeta in Equation 2 and Table S1 of Franks et al. (2014)	error in s4	scaling from photosynthetic rate (An) to mesophyll conductance to CO2 (gm); Franks et al. (2014) suggests a generic scaling of 0.013	error in s5	If set to 'yes', the code assumes a fixed photosynthetic rate equal to A0 and solves only for CO2, using the first main equation (i.e. Eq. 1 in Franks et al., 2014). That is, An is set equal to A0. This option can be used if An is known independently, for example measured in living plants to run the model for present-day or growth-chamber conditions. Otherwise, the code jointly solves for CO2 and…
location	position	species	plant type	factor tested	n	target CO2	CO2	2.5th	16th	84th	97.5th	d13C_soil	Dab	eDab	Dad	eDad	GCLab	eGCLab	GCLad	eGCLad	GCWab	eGCWab	GCWad	eGCWad	d13Cp	ed13Cp	d13Ca	ed13Ca	CO2_0	A0	eA0	CiCa0	eCiCa0	gb	egb	s1	es1	s2	es2	s3	es3	s4	es4	s5	es5	fixed_A
ConnColl	canopy	Abies balsamea	conifer	general (Figure 2; section 3.1)	1	400	429.32	383.925	405.51	454.902	481.409	-27.55	136000000	5370000	0	0	3.15e-05	1.16e-06	0	0	1.74e-05	3.69e-07	0	0	-29.6	0.15	-8.5	0.1	360	10	0.5	0.68	0.007	2	0.1	1	0	1	0.05	0.5	0.025	0.2	0.01	0.013	0.00065	yes
ConnColl	canopy	Heptacodium miconioides	angiosperm	general (Figure 2; section 3.1)	1	400	434.285	380.587	406.228	466.689	503.478	-27.55	189000000	5370000	0	0	1.54e-05	1.16e-06	0	0	9.23e-06	3.69e-07	0	0	-29.3	0.15	-8.5	0.1	360	12	0.6	0.67	0.007	2	0.1	1	0	1	0.05	1	0.05	0.2	0.01	0.013	0.00065	yes
ConnColl	canopy	Taxodium distichum	conifer	general (Figure 2; section 3.1)	1	400	383.372	337.595	358.76	410.303	438.297	-27.55	148000000	5370000	0	0	2.07e-05	1.16e-06	0	0	9.7e-06	3.69e-07	0	0	-27.6	0.15	-8.5	0.1	360	10	0.5	0.6	0.007	2	0.1	1	0	1	0.05	0.5	0.025	0.2	0.01	0.013	0.00065	yes
DinoStatePark	canopy	Juniperus communis	conifer	general (Figure 2; section 3.1)	1	400	274.923	250.56	262.038	288.822	303.121	-27.55	336000000	5370000	0	0	2.36e-05	1.16e-06	0	0	9.08e-06	3.69e-07	0	0	-27.9	0.15	-8.5	0.1	360	10	0.5	0.61	0.007	2	0.1	1	0	1	0.05	0.5	0.025	0.2	0.01	0.013	0.00065	yes
DinoStatePark	canopy	Tsuga canadensis	conifer	general (Figure 2; section 3.1)	1	400	321.182	289.112	304.527	338.974	358.491	-27.55	207000000	5370000	0	0	2.31e-05	1.16e-06	0	0	1.01e-05	3.69e-07	0	0	-27.8	0.15	-8.5	0.1	360	10	0.5	0.6	0.007	2	0.1	1	0	1	0.05	0.5	0.025	0.2	0.01	0.013	0.00065	yes
LongLane	canopy	Betula papyrifera	angiosperm	general (Figure 2; section 3.1)	1	400	489.098	433.007	458.962	522.146	560.093	-27.55	96200000	5370000	0	0	2.32e-05	1.16e-06	0	0	8.93e-06	3.69e-07	0	0	-29.9	0.15	-8.5	0.1	360	12	0.6	0.69	0.007	2	0.1	1	0	1	0.05	1	0.05	0.2	0.01	0.013	0.00065	yes
LongLane	canopy	Castanea dentata	angiosperm	general (Figure 2; section 3.1)	1	400	303.949	271.047	286.444	323.954	347.893	-27.55	760000000	5370000	0	0	9.8e-06	1.16e-06	0	0	6.04e-06	3.69e-07	0	0	-28.8	0.15	-8.5	0.1	360	12	0.6	0.64	0.007	2	0.1	1	0	1	0.05	1	0.05	0.2	0.01	0.013	0.00065	yes
LongLane	canopy	Cercidiphyllum japonicum	angiosperm	general (Figure 2; section 3.1)	4	400	636.303	553.192	591.907	685.22	741.194	-27.55	84800000	4560000	0	0	1.56e-05	6.76e-07	0	0	7.94e-06	2.41e-07	0	0	-29.4	0.09	-8.5	0.1	360	12	0.6	0.67	0.004	2	0.1	1	0	1	0.05	1	0.05	0.2	0.01	0.013	0.00065	yes
LongLane	canopy	Cladrastis kentukea	angiosperm	general (Figure 2; section 3.1)	1	400	585.324	501.238	539.459	642.048	711.594	-27.55	323000000	5370000	0	0	9.64e-06	1.16e-06	0	0	5e-06	3.69e-07	0	0	-31.7	0.15	-8.5	0.1	360	12	0.6	0.76	0.007	2	0.1	1	0	1	0.05	1	0.05	0.2	0.01	0.013	0.00065	yes
LongLane	canopy	Metasequoia glyptostroboides	conifer	general (Figure 2; section 3.1)	1	400	415.353	369.256	391.248	442.365	471.336	-27.55	149000000	5370000	0	0	3.06e-05	1.16e-06	0	0	1.77e-05	5.04e-07	0	0	-28.5	0.15	-8.5	0.1	360	10	0.5	0.63	0.007	2	0.1	0.84	0.0073	1	0.05	0.5	0.025	0.2	0.01	0.013	0.00065	yes
LongLane	canopy	Nyssa sylvatica	angiosperm	general (Figure 2; section 3.1)	1	400	358.486	320.022	337.439	381.043	407.357	-27.55	250000000	5370000	0	0	1.48e-05	1.16e-06	0	0	6.84e-06	3.69e-07	0	0	-28.8	0.15	-8.5	0.1	360	12	0.6	0.64	0.007	2	0.1	1	0	1	0.05	1	0.05	0.2	0.01	0.013	0.00065	yes
LongLane	canopy	Quercus palustris	angiosperm	general (Figure 2; section 3.1)	1	400	354.051	312.438	331.096	381.201	412.569	-27.55	367000000	5370000	0	0	1.22e-05	1.16e-06	0	0	9.44e-06	3.69e-07	0	0	-28.6	0.15	-8.5	0.1	360	12	0.6	0.64	0.007	2	0.1	1	0	1	0.05	1	0.05	0.2	0.01	0.013	0.00065	yes
LongLane	canopy	Styrax japonicus	angiosperm	general (Figure 2; section 3.1)	1	400	300.623	266.445	282.119	323.523	352.755	-27.55	408000000	5370000	0	0	1.1e-05	1.16e-06	0	0	6.86e-06	3.69e-07	0	0	-27.4	0.15	-8.5	0.1	360	12	0.6	0.59	0.007	2	0.1	1	0	1	0.05	1	0.05	0.2	0.01	0.013	0.00065	yes
LongLane	canopy	Syringa reticulata	angiosperm	general (Figure 2; section 3.1)	1	400	471.67	417.945	442.474	503.218	540.036	-27.55	215000000	5370000	0	0	1.55e-05	1.16e-06	0	0	7.39e-06	3.69e-07	0	0	-30.6	0.15	-8.5	0.1	360	12	0.6	0.72	0.007	2	0.1	1	0	1	0.05	1	0.05	0.2	0.01	0.013	0.00065	yes
LongLane	canopy	Tilia cordata	angiosperm	general (Figure 2; section 3.1)	4	400	587.675	512.891	548.241	631.084	676.579	-27.55	196000000	9530000	0	0	1.49e-05	7.19e-07	0	0	5.96e-06	2.24e-07	0	0	-31.8	0.23	-8.5	0.1	360	12	0.6	0.77	0.01	2	0.1	1	0	1	0.05	1	0.05	0.2	0.01	0.013	0.00065	yes
LongLane	canopy	Zelkova serrata	angiosperm	general (Figure 2; section 3.1)	1	400	473.607	417.187	443.861	506.836	542.703	-27.55	186000000	5370000	0	0	1.63e-05	1.16e-06	0	0	8.27e-06	3.69e-07	0	0	-30.3	0.15	-8.5	0.1	360	12	0.6	0.7	0.007	2	0.1	1	0	1	0.05	1	0.05	0.2	0.01	0.013	0.00065	yes
Panama	canopy	Carapa sp.	angiosperm	general (Figure 2; section 3.1)	2	400	409.34	369.888	388.934	431.119	453.45	-28.21	859000000	20900000	0	0	5.17e-06	1.85e-07	0	0	3.96e-06	2.15e-07	0	0	-29.79	0.08	-8.5	0.1	360	12	0.6	0.685285	0.00333277	2	0.1	1	0	1	0.05	1	0.05	0.2	0.01	0.013	0.00065	yes
Panama	canopy	Clusia sp.	angiosperm	general (Figure 2; section 3.1)	1	400	438.589	387.296	410.919	467.421	498.909	-28.21	265000000	11000000	0	0	8.86e-06	2.18e-07	0	0	7.48e-06	1.6e-07	0	0	-27.75	0.27	-8.5	0.1	360	12	0.6	0.601565	0.011133	2	0.1	1	0	1	0.05	1	0.05	0.2	0.01	0.013	0.00065	yes
Panama	canopy	Cydista sp.	angiosperm	general (Figure 2; section 3.1)	2	400	508.912	448.241	476.137	545.53	583.206	-28.21	323000000	13300000	0	0	4.76e-06	4.9e-08	0	0	2.69e-06	4.92e-08	0	0	-27.99	0.31	-8.5	0.1	360	12	0.6	0.611426	0.0128104	2	0.1	1	0	1	0.05	1	0.05	0.2	0.01	0.013	0.00065	yes
Panama	canopy	Davilla sp.	angiosperm	general (Figure 2; section 3.1)	3	400	496.511	444.49	469.177	526.539	557.426	-28.21	306000000	7090000	0	0	1e-05	1.17e-07	0	0	7.35e-06	8.6e-08	0	0	-30.16	0.21	-8.5	0.1	360	12	0.6	0.700518	0.00862974	2	0.1	1	0	1	0.05	1	0.05	0.2	0.01	0.013	0.00065	yes
Panama	canopy	Dioclea sp.	angiosperm	general (Figure 2; section 3.1)	3	400	452.284	404.06	426.737	479.48	509.747	-28.21	261000000	18900000	0	0	9.22e-06	1.69e-07	0	0	4.35e-06	3.98e-08	0	0	-29.27	0.09	-8.5	0.1	360	12	0.6	0.663833	0.00378033	2	0.1	1	0	1	0.05	1	0.05	0.2	0.01	0.013	0.00065	yes
Panama	canopy	Forsteronia sp.	angiosperm	general (Figure 2; section 3.1)	1	400	570.431	501.207	532.817	611.594	654.027	-28.21	381000000	16400000	0	0	6.38e-06	1.7e-07	0	0	3.33e-06	6.74e-08	0	0	-30.94	0.27	-8.5	0.1	360	12	0.6	0.73274	0.011133	2	0.1	1	0	1	0.05	1	0.05	0.2	0.01	0.013	0.00065	yes
Panama	canopy	Guarea sp.	angiosperm	general (Figure 2; section 3.1)	3	400	560.71	480.233	518.423	607.702	660.451	-28.21	305000000	5670000	0	0	6.87e-06	1.38e-07	0	0	4.36e-06	1.09e-07	0	0	-30.03	0.44	-8.5	0.1	360	12	0.6	0.695211	0.0181833	2	0.1	1	0	1	0.05	1	0.05	0.2	0.01	0.013	0.00065	yes
Panama	canopy	Heisteria sp.	angiosperm	general (Figure 2; section 3.1)	2	400	582.909	524.801	552.494	614.61	649.655	-28.21	398000000	9120000	0	0	6.46e-06	8.19e-08	0	0	5.54e-06	6.1e-08	0	0	-30.5	0	-8.5	0.1	360	12	0.6	0.71456	0	2	0.1	1	0	1	0.05	1	0.05	0.2	0.01	0.013	0.00065	yes
Panama	canopy	Inga sp.	angiosperm	general (Figure 2; section 3.1)	1	400	624.907	540.442	579.752	674.913	732.327	-28.21	634000000	17100000	0	0	7.79e-06	1.52e-07	0	0	3.71e-06	1.22e-07	0	0	-32.85	0.27	-8.5	0.1	360	12	0.6	0.811439	0.011133	2	0.1	1	0	1	0.05	1	0.05	0.2	0.01	0.013	0.00065	yes
Panama	canopy	Manilkara sp.	angiosperm	general (Figure 2; section 3.1)	2	400	357.924	325.405	340.421	376.14	395.19	-28.21	310000000	6930000	0	0	9.89e-06	1.42e-07	0	0	5.55e-06	8.95e-08	0	0	-27.94	0.14	-8.5	0.1	360	12	0.6	0.609147	0.00569741	2	0.1	1	0	1	0.05	1	0.05	0.2	0.01	0.013	0.00065	yes
Panama	canopy	Miconia sp.	angiosperm	general (Figure 2; section 3.1)	1	400	428.026	381.65	403.251	455.22	483.396	-28.21	723000000	16900000	0	0	4.35e-06	1.2e-07	0	0	2.9e-06	5.18e-08	0	0	-29.28	0.27	-8.5	0.1	360	12	0.6	0.664328	0.011133	2	0.1	1	0	1	0.05	1	0.05	0.2	0.01	0.013	0.00065	yes
Panama	canopy	Ocotea sp.	angiosperm	general (Figure 2; section 3.1)	1	400	518.141	454.059	484.305	555.359	597.512	-28.21	617000000	21800000	0	0	9.44e-06	8.04e-08	0	0	5.44e-06	2.14e-08	0	0	-32.11	0.27	-8.5	0.1	360	12	0.6	0.780987	0.011133	2	0.1	1	0	1	0.05	1	0.05	0.2	0.01	0.013	0.00065	yes
Panama	canopy	Odontadenia sp.	angiosperm	general (Figure 2; section 3.1)	3	400	469.787	422.778	445.294	496.41	524.126	-28.21	310000000	11100000	0	0	9.08e-06	1.96e-07	0	0	3.25e-06	4.54e-08	0	0	-30.35	0.17	-8.5	0.1	360	12	0.6	0.708273	0.00700313	2	0.1	1	0	1	0.05	1	0.05	0.2	0.01	0.013	0.00065	yes
Panama	canopy	Omphalea sp.	angiosperm	general (Figure 2; section 3.1)	3	400	399.39	363.354	380.651	419.04	439.117	-28.21	397000000	7870000	0	0	9.47e-06	7.69e-08	0	0	5.05e-06	5.29e-08	0	0	-29.58	0.13	-8.5	0.1	360	12	0.6	0.676592	0.00536725	2	0.1	1	0	1	0.05	1	0.05	0.2	0.01	0.013	0.00065	yes
Panama	canopy	Paulinia sp.	angiosperm	general (Figure 2; section 3.1)	2	400	514.312	449.923	480.537	551.77	592.63	-28.21	506000000	15300000	0	0	7.1e-06	1.51e-07	0	0	5.19e-06	7.09e-08	0	0	-30.85	0.31	-8.5	0.1	360	12	0.6	0.728847	0.0126798	2	0.1	1	0	1	0.05	1	0.05	0.2	0.01	0.013	0.00065	yes
Panama	canopy	Pera sp.	angiosperm	general (Figure 2; section 3.1)	3	400	619.744	533.654	573.831	670.275	726.618	-28.21	291000000	11400000	0	0	5.8e-06	2.47e-07	0	0	3.41e-06	9.71e-08	0	0	-29.97	0.31	-8.5	0.1	360	12	0.6	0.69281	0.0128028	2	0.1	1	0	1	0.05	1	0.05	0.2	0.01	0.013	0.00065	yes
Panama	canopy	Sapium sp.	angiosperm	general (Figure 2; section 3.1)	3	400	342.201	303.253	321.644	365.028	389.327	-28.21	259000000	6010000	0	0	1.15e-05	1.26e-07	0	0	5.14e-06	6.93e-08	0	0	-27.72	0.42	-8.5	0.1	360	12	0.6	0.600394	0.0170749	2	0.1	1	0	1	0.05	1	0.05	0.2	0.01	0.013	0.00065	yes
Panama	canopy	Symphonia sp.	angiosperm	general (Figure 2; section 3.1)	2	400	848.763	752.943	798.247	906.108	966.751	-28.21	184000000	11700000	0	0	9.52e-06	1.1e-07	0	0	4.83e-06	8.87e-08	0	0	-32.3	0	-8.5	0.1	360	12	0.6	0.788823	0.000144757	2	0.1	1	0	1	0.05	1	0.05	0.2	0.01	0.013	0.00065	yes
Panama	canopy	Tontelea sp.	angiosperm	general (Figure 2; section 3.1)	3	400	568.307	504.333	534.207	604.499	641.078	-28.21	519000000	21700000	0	0	6.26e-06	9.99e-08	0	0	6.33e-06	1.09e-07	0	0	-30.8	0.18	-8.5	0.1	360	12	0.6	0.72708	0.00738302	2	0.1	1	0	1	0.05	1	0.05	0.2	0.01	0.013	0.00065	yes
Panama	canopy	Tovomita sp.	angiosperm	general (Figure 2; section 3.1)	2	400	729.325	653.248	689.854	774.434	820.089	-28.21	201000000	8030000	0	0	8.39e-06	8.82e-08	0	0	4.07e-06	1.07e-07	0	0	-31.36	0.02	-8.5	0.1	360	12	0.6	0.749822	0.00082557	2	0.1	1	0	1	0.05	1	0.05	0.2	0.01	0.013	0.00065	yes
Panama	canopy	unknown sp.	angiosperm	general (Figure 2; section 3.1)	2	400	508.733	375.429	433.283	612.959	751.598	-28.21	194000000	7470000	0	0	8.52e-06	8.29e-08	0	0	4.26e-06	4.68e-08	0	0	-28.6	1.45	-8.5	0.1	360	12	0.6	0.636549	0.0596177	2	0.1	1	0	1	0.05	1	0.05	0.2	0.01	0.013	0.00065	yes
PuertoRico	canopy	Cyathea arborea	fern	general (Figure 2; section 3.1)	4	400	291.246	260.789	274.999	308.764	326.934	-28.21	248000000	6720000	0	0	1.76e-05	5.85e-07	0	0	7.53e-06	2.97e-07	0	0	-28.3	0.31	-8.5	0.1	360	6	0.3	0.62	0.013	2	0.1	1	0	1	0.05	0.5	0.025	0.2	0.01	0.013	0.00065	yes
Wesleyan	canopy	Picea omorika	conifer	general (Figure 2; section 3.1)	1	400	478.989	423.747	449.706	511.598	546.498	-27.55	103000000	5370000	0	0	3e-05	1.16e-06	0	0	1.5e-05	3.69e-07	0	0	-29.5	0.15	-8.5	0.1	360	10	0.5	0.67	0.007	2	0.1	1	0	1	0.05	0.5	0.025	0.2	0.01	0.013	0.00065	yes
Wesleyan	canopy	Pinus thunbergii	conifer	general (Figure 2; section 3.1)	2	400	590.862	472.729	522.419	691.2	837.212	-27.55	73800000	2910000	64800000	2040000	2.61e-05	7.12e-06	2.52e-05	3.23e-06	2.07e-05	7.85e-07	1.97e-05	2.57e-07	-30.8	0.15	-8.5	0.1	360	10	0.5	0.73	0.007	2	0.1	1	0	1	0.05	0.5	0.025	0.2	0.01	0.013	0.00065	yes
ConnColl	understory	Dryopteris marginalis	fern	canopy position in temperate forest (section 3.4)	1	400	449.82	380.873	412.316	494.002	542.502	-27.55	105000000	5370000	0	0	2.22e-05	1.16e-06	0	0	1.64e-05	3.69e-07	0	0	-28.8	0.15	-8.5	0.1	360	6	0.3	0.65	0.007	2	0.1	1	0	1	0.05	0.5	0.025	0.2	0.01	0.013	0.00065	no
ConnColl	understory	Matteuccia struthiopteris	fern	canopy position in temperate forest (section 3.4)	1	400	598.277	490.953	539.358	668.008	749.39	-27.55	55900000	5370000	0	0	2.72e-05	1.16e-06	0	0	1.46e-05	3.69e-07	0	0	-29.6	0.15	-8.5	0.1	360	6	0.3	0.68	0.007	2	0.1	1	0	1	0.05	0.5	0.025	0.2	0.01	0.013	0.00065	no
ConnColl	understory	Osmunda claytoniana	fern	canopy position in temperate forest (section 3.4)	4	400	645.664	543.322	590.374	707.497	780.481	-27.55	64300000	1930000	0	0	2.27e-05	9.37e-07	0	0	1.7e-05	4.15e-07	0	0	-29	0.02	-8.5	0.1	360	6	0.3	0.65	0.007	2	0.1	1	0	1	0.05	0.5	0.025	0.2	0.01	0.013	0.00065	no
ConnColl	understory	Osmunda regalis	fern	canopy position in temperate forest (section 3.4)	4	400	1133.96	947.984	1034.63	1246.1	1379.55	-27.55	61100000	3900000	0	0	1.93e-05	4.07e-07	0	0	1.68e-05	2.68e-07	0	0	-31.2	0.05	-8.5	0.1	360	6	0.3	0.74	0.002	2	0.1	1	0	1	0.05	0.5	0.025	0.2	0.01	0.013	0.00065	no
ConnColl	understory	Osmundastrum cinnamomeum	fern	canopy position in temperate forest (section 3.4)	4	400	1190.29	1022.34	1103.74	1285.74	1387.28	-27.55	48200000	1570000	0	0	2.76e-05	5.28e-07	0	0	1.61e-05	4.32e-07	0	0	-32.8	0.09	-8.5	0.1	360	6	0.3	0.81	0.004	2	0.1	1	0	1	0.05	0.5	0.025	0.2	0.01	0.013	0.00065	no
ConnColl	understory	Polystichum acrostichoides	fern	canopy position in temperate forest (section 3.4)	4	400	885.23	754.559	814.845	964.032	1050.63	-27.55	40100000	968000	0	0	2.61e-05	7.45e-07	0	0	1.68e-05	3.64e-07	0	0	-29.9	0.06	-8.5	0.1	360	6	0.3	0.69	0.002	2	0.1	1	0	1	0.05	0.5	0.025	0.2	0.01	0.013	0.00065	no
Panama	understory	Doliocarpus sp.	angiosperm	canopy position in tropical forest (section 3.4)	1	400	4752.08	3190.76	3829.77	6212.74	8741.07	-28.21	133000000	4530000	0	0	9.9e-06	7.17e-08	0	0	4.54e-06	2e-08	0	0	-36.08	0.27	-8.5	0.1	360	12	0.6	0.945694	0.011133	2	0.1	1	0	1	0.05	1	0.05	0.2	0.01	0.013	0.00065	no
Panama	understory	Marila sp.	angiosperm	canopy position in tropical forest (section 3.4)	2	400	1933.05	1621.66	1764.16	2120.44	2331.89	-28.21	220000000	10500000	0	0	7.3e-06	1e-07	0	0	3.58e-06	1.12e-07	0	0	-34.57	0.14	-8.5	0.1	360	12	0.6	0.882996	0.00571367	2	0.1	1	0	1	0.05	1	0.05	0.2	0.01	0.013	0.00065	no
Panama	understory	Ocotea sp.	angiosperm	canopy position in tropical forest (section 3.4)	1	400	5631.64	3999.37	4695.04	6993.36	8996.13	-28.21	96800000	3330000	0	0	8.74e-06	1.11e-07	0	0	4.96e-06	5.76e-08	0	0	-35.83	0.27	-8.5	0.1	360	12	0.6	0.935443	0.011133	2	0.1	1	0	1	0.05	1	0.05	0.2	0.01	0.013	0.00065	no
Panama	understory	Perebea sp.	angiosperm	canopy position in tropical forest (section 3.4)	1	400	3033.92	2262.64	2596.34	3566.74	4218.36	-28.21	122000000	12100000	0	0	9.08e-06	2.08e-07	0	0	5.72e-06	6.45e-08	0	0	-34.91	0.27	-8.5	0.1	360	12	0.6	0.897066	0.011133	2	0.1	1	0	1	0.05	1	0.05	0.2	0.01	0.013	0.00065	no
Panama	understory	Tontelea sp.	angiosperm	canopy position in tropical forest (section 3.4)	2	400	16685	-157749	8565.41	41367.6	209616	-28.21	117000000	3590000	0	0	7.04e-06	1.04e-07	0	0	7.75e-06	5.33e-08	0	0	-36.75	0.46	-8.5	0.1	360	12	0.6	0.973756	0.0193475	2	0.1	1	0	1	0.05	1	0.05	0.2	0.01	0.013	0.00065	no
ReedGap	understory	Anemone quinquefolia	angiosperm	canopy position in temperate forest (section 3.4)	1	400	664.547	548.162	600.581	739.994	826.355	-26.35	54400000	5370000	0	0	3.03e-05	1.16e-06	0	0	1.42e-05	3.69e-07	0	0	-29.9	0.15	-8.5	0.1	360	12	0.6	0.69	0.007	2	0.1	1	0	1	0.05	1	0.05	0.2	0.01	0.013	0.00065	no
ReedGap	understory	Hepatica nobilis	angiosperm	canopy position in temperate forest (section 3.4)	1	400	607.921	471.333	530.742	705.641	829.885	-26.35	47500000	5370000	11700000	5370000	2.27e-05	1.16e-06	2.08e-05	1.16e-06	1.3e-05	3.69e-07	1.24e-05	3.69e-07	-27.5	0.15	-8.5	0.1	360	12	0.6	0.59	0.007	2	0.1	1	0	1	0.05	1	0.05	0.2	0.01	0.013	0.00065	no
ReedGap	understory	Maiathemum racemosa	angiosperm	canopy position in temperate forest (section 3.4)	4	400	870.799	740.563	801.495	949.415	1036.39	-26.35	88100000	6140000	0	0	1.76e-05	2.36e-07	0	0	7.82e-06	2.81e-07	0	0	-31.4	0.15	-8.5	0.1	360	12	0.6	0.75	0.006	2	0.1	1	0	1	0.05	1	0.05	0.2	0.01	0.013	0.00065	no
ReedGap	understory	Osmorhiza claytonii	angiosperm	canopy position in temperate forest (section 3.4)	1	400	753.186	608.056	670.767	853.49	977.525	-26.35	146000000	5370000	0	0	1.17e-05	1.16e-06	0	0	5.94e-06	3.69e-07	0	0	-30.7	0.15	-8.5	0.1	360	12	0.6	0.72	0.007	2	0.1	1	0	1	0.05	1	0.05	0.2	0.01	0.013	0.00065	no
ReedGap	understory	Prenanthes trifoliolata	angiosperm	canopy position in temperate forest (section 3.4)	4	400	727.886	634.83	679.211	782.825	840.288	-26.35	118000000	3410000	0	0	1.72e-05	4.97e-07	0	0	6.74e-06	3.54e-07	0	0	-31.5	0.15	-8.5	0.1	360	12	0.6	0.75	0.006	2	0.1	1	0	1	0.05	1	0.05	0.2	0.01	0.013	0.00065	no
ReedGap	understory	Saxifraga virginiensis	angiosperm	canopy position in temperate forest (section 3.4)	4	400	860.735	709.105	777.663	958.939	1068.14	-26.35	94300000	7760000	77400000	9890000	1.38e-05	6.1e-07	1.38e-05	5.02e-07	7.17e-06	4.57e-07	7.2e-06	4.19e-07	-32.6	0.29	-8.5	0.1	360	12	0.6	0.8	0.012	2	0.1	1	0	1	0.05	1	0.05	0.2	0.01	0.013	0.00065	no
ReedGap	understory	Trillium cernuum	angiosperm	canopy position in temperate forest (section 3.4)	4	400	1568.6	1331.03	1448.02	1704.1	1851.99	-26.35	15000000	381000	0	0	3.82e-05	3.02e-07	0	0	2.23e-05	3e-07	0	0	-29.2	0.04	-8.5	0.1	360	12	0.6	0.66	0.001	2	0.1	1	0	1	0.05	1	0.05	0.2	0.01	0.013	0.00065	no
ReedGap	understory	Zizia aptera	angiosperm	canopy position in temperate forest (section 3.4)	4	400	490.881	426.979	456.271	530.683	578.282	-26.35	139000000	21500000	67100000	2930000	1.41e-05	2.85e-07	1.53e-05	3.51e-07	6.84e-06	3.59e-07	6.65e-06	3.5e-07	-30.4	0.05	-8.5	0.1	360	12	0.6	0.71	0.002	2	0.1	1	0	1	0.05	1	0.05	0.2	0.01	0.013	0.00065	no
Wesleyan	understory	Onoclea sensibilis	fern	canopy position in temperate forest (section 3.4)	1	400	505.877	422.163	459.167	557.204	618.276	-27.55	91900000	5370000	0	0	2.05e-05	1.16e-06	0	0	1.27e-05	3.69e-07	0	0	-29.1	0.15	-8.5	0.1	360	6	0.3	0.66	0.007	2	0.1	1	0	1	0.05	0.5	0.025	0.2	0.01	0.013	0.00065	no
growth chamber experiment		Betula lenta from seed, warm treatment	angiosperm	temperature (Figure 5; section 3.2)	5	500	801.404	603.66	693.441	934.528	1093.57		1.5555e+08	1.14974e+07	0	0	9.49474e-06	3.92974e-07	0	0	7.56742e-06	3.28084e-07	0	0	-31.4661	0.666501	-10.6242	0.075	360	12	0.6	0.668803	0.0274357	2	0.1	1	0	1	0.05	1	0.05	0.2	0.01	0.013	0.00065	no
growth chamber experiment		Betula lenta from seed, cool treatment	angiosperm	temperature (Figure 5; section 3.2)	5	500	467.567	343.492	396.94	558.594	669.499		1.83314e+08	1.90874e+07	0	0	1.15743e-05	9.91078e-07	0	0	8.10354e-06	4.31285e-07	0	0	-29.8112	0.632041	-10.6242	0.075	360	12	0.6	0.60075	0.0259607	2	0.1	1	0	1	0.05	1	0.05	0.2	0.01	0.013	0.00065	no
growth chamber experiment		Quercus rubra from seed, warm treatment	angiosperm	temperature (Figure 5; section 3.2)	5	500	527.531	380.108	447.222	620.085	726.917		2.95959e+08	2.07808e+07	0	0	6.04608e-06	2.90602e-07	0	0	6.33808e-06	1.50656e-07	0	0	-28.2537	0.7129	-10.6242	0.075	360	12	0.6	0.53689	0.0291526	2	0.1	1	0	1	0.05	1	0.05	0.2	0.01	0.013	0.00065	no
growth chamber experiment		Quercus rubra from seed, cool treatment	angiosperm	temperature (Figure 5; section 3.2)	5	500	511.099	388.946	442.598	598.815	704.489		2.88334e+08	2.47859e+07	0	0	7.36846e-06	5.91078e-07	0	0	6.33819e-06	8.12615e-08	0	0	-29.8875	0.422831	-10.6242	0.075	360	12	0.6	0.603869	0.017347	2	0.1	1	0	1	0.05	1	0.05	0.2	0.01	0.013	0.00065	no
growth chamber experiment		Acer negundo from sapling, warm treatment	angiosperm	temperature (Figure 5; section 3.2)	5	500	367.024	286.547	322.824	418.298	478.581		2.17322e+08	2.04374e+07	0	0	1.21417e-05	7.38611e-07	0	0	7.69561e-06	2.10918e-07	0	0	-29.1575	0.496303	-10.6242	0.075	360	12	0.6	0.573879	0.020378	2	0.1	1	0	1	0.05	1	0.05	0.2	0.01	0.013	0.00065	no
growth chamber experiment		Acer negundo from sapling, cool treatment	angiosperm	temperature (Figure 5; section 3.2)	5	500	315.92	238.68	272.648	363.842	421.062		2.0211e+08	1.74982e+07	0	0	1.34708e-05	5.7542e-07	0	0	7.67268e-06	3.01079e-07	0	0	-28.4717	0.703513	-10.6242	0.075	360	12	0.6	0.545813	0.0287915	2	0.1	1	0	1	0.05	1	0.05	0.2	0.01	0.013	0.00065	no
growth chamber experiment		Carpinus caroliniana from sapling, warm treatment	angiosperm	temperature (Figure 5; section 3.2)	5	500	705.65	544.952	617.797	808.444	935.428		2.8403e+08	2.56344e+07	0	0	6.70868e-06	3.70609e-07	0	0	7.74653e-06	1.37216e-07	0	0	-30.7582	0.324913	-10.6242	0.075	360	12	0.6	0.639599	0.013358	2	0.1	1	0	1	0.05	1	0.05	0.2	0.01	0.013	0.00065	no
growth chamber experiment		Carpinus caroliniana from sapling, cool treatment	angiosperm	temperature (Figure 5; section 3.2)	5	500	620.911	430.027	518.893	739.91	875.672		3.0335e+08	2.68786e+07	0	0	4.88638e-06	1.50798e-07	0	0	6.92565e-06	1.92763e-07	0	0	-26.0762	0.627476	-10.6242	0.075	360	12	0.6	0.447966	0.0255418	2	0.1	1	0	1	0.05	1	0.05	0.2	0.01	0.013	0.00065	no
growth chamber experiment		Ilex opaca from sapling, warm treatment	angiosperm	temperature (Figure 5; section 3.2)	3	500	607.802	415.077	499.055	749.208	938.533		2.61648e+08	9.15663e+06	0	0	1.07381e-05	3.56586e-07	0	0	1.1462e-05	3.77464e-07	0	0	-32.0385	1.10912	-10.6242	0.075	360	12	0.6	0.692421	0.0456933	2	0.1	1	0	1	0.05	1	0.05	0.2	0.01	0.013	0.00065	no
growth chamber experiment		Ilex opaca from sapling, cool treatment	angiosperm	temperature (Figure 5; section 3.2)	2	500	478.344	350.407	405.293	576.977	708.264		2.19875e+08	1.90641e+07	0	0	1.18449e-05	1.46893e-06	0	0	8.86115e-06	4.39795e-07	0	0	-30.8075	0.62349	-10.6242	0.075	360	12	0.6	0.641653	0.0256874	2	0.1	1	0	1	0.05	1	0.05	0.2	0.01	0.013	0.00065	no
growth chamber experiment		Ostrya virginiana from sapling, warm treatment	angiosperm	temperature (Figure 5; section 3.2)	5	500	731.499	487.678	593.734	898.676	1109.26		1.78628e+08	1.52432e+07	0	0	7.73734e-06	3.26805e-07	0	0	6.90691e-06	1.26377e-07	0	0	-29.7837	1.13874	-10.6242	0.075	360	12	0.6	0.599761	0.0467866	2	0.1	1	0	1	0.05	1	0.05	0.2	0.01	0.013	0.00065	no
growth chamber experiment		Ostrya virginiana from sapling, cool treatment	angiosperm	temperature (Figure 5; section 3.2)	5	500	790.544	568.859	664.373	942.518	1136.17		1.96571e+08	2.53479e+07	0	0	7.56096e-06	4.69938e-07	0	0	6.98629e-06	4.39795e-07	0	0	-30.9403	0.561453	-10.6242	0.075	360	12	0.6	0.647135	0.0230729	2	0.1	1	0	1	0.05	1	0.05	0.2	0.01	0.013	0.00065	no
